# Supplementary material for: Radiomics Profiling Identifies the Value of CT Features for the Preoperative Evaluation of Lymph Node Metastasis in Papillary Thyroid Carcinoma
Source: MDPI journal article supplement (doi:10.3390/diagnostics12051119), 2022-04-29
Supplement: s1 [file s1]

**Table S1.** The coefficients of features in the clinical-radiological model

| Model categories              | Features      | Coefficients |
|-------------------------------|---------------|--------------|
| Clinical-radiological model 1 | PCA_feature_1 | 0.650        |
|                               | PCA_feature_5 | -0.783       |
|                               | Age           | -4.101       |
|                               | CT-report     | -1.245       |
|                               | AD            | -0.510       |
| Clinical-radiological model 2 | TD            | 5.688        |
|                               | A/T           | 2.240        |
|                               | Capsule       | 0.819        |
|                               | Location      | 0.111        |
|                               | PCA_feature_1 | 0.443        |
| Clinical-radiological model 3 | PCA_feature_2 | -0.803       |
|                               | PCA_feature_3 | 0.074        |
|                               | PCA_feature_4 | 0.293        |
|                               | PCA_feature_5 | 0.108        |
|                               | PCA_feature_6 | -0.075       |

**Table S2.** The coefficients of radiomics features in the different models

| Model categories        | Features                                                | Coefficients |
|-------------------------|---------------------------------------------------------|--------------|
| Noncontrast model       | NC_original_ngtdm_Coarseness                            | -2.959       |
|                         | NC_original_shape_LeastAxisLength                       | -3.272       |
|                         | NC_original_shape_MajorAxisLength                       | 6.304        |
|                         | NC_original_shape_Maximum2DDiameterRow                  | 2.473        |
|                         | NC_original_shape_Maximum2DDiameterSlice                | -0.542       |
|                         | NC_original_shape_MinorAxisLength                       | -1.077       |
|                         | NC_original_shape_SurfaceVolumeRatio                    | -1.040       |
|                         | NC_wavelet-HHH_ngtdm_Coarseness                         | 1.661        |
|                         | NC_wavelet-HLH_glszm_ZoneEntropy                        | -0.292       |
|                         | NC_wavelet-HLL_glszm_ZoneEntropy                        | 3.384        |
|                         | NC_wavelet-HLL_ngtdm_Coarseness                         | -1.373       |
|                         | NC_wavelet-LLH_gldm_SmallDependenceLowGrayLevelEmphasis | -0.758       |
|                         | NC_wavelet-LLL_gldm_SmallDependenceLowGrayLevelEmphasis | 0.719        |
|                         | NC_wavelet-LLL_glszm_ZoneEntropy                        | -4.093       |
|                         | NC_wavelet-LLL_ngtdm_Coarseness                         | 0.029        |
|                         | A_original_shape_LeastAxisLength                        | -2.768       |
|                         | A_original_shape_MajorAxisLength                        | 5.493        |
|                         | A_original_shape_Maximum2DDiameterRow                   | 4.552        |
| Arterial contrast model | A_original_shape_Maximum2DDiameterSlice                 | -3.203       |
|                         | A_original_shape_MinorAxisLength                        | -1.775       |
|                         | A_original_shape_Sphericity                             | -1.274       |
|                         | A_original_shape_SurfaceVolumeRatio                     | -0.617       |

|                             |                                                        |        |
|-----------------------------|--------------------------------------------------------|--------|
| Venous contrast model       | A_wavelet-HHH_glcmm_MaximumProbability                 | -1.679 |
|                             | A_wavelet-HHH_gldm_LargeDependenceEmphasis             | 1.068  |
|                             | A_wavelet-HHH_gldm_LargeDependenceLowGrayLevelEmphasis | -2.052 |
|                             | A_wavelet-HHH_glrmm_LongRunLowGrayLevelEmphasis        | -1.541 |
|                             | A_wavelet-HHL_glszm_ZonePercentage                     | -3.954 |
|                             | A_wavelet-HLH_glszm_ZoneEntropy                        | 3.221  |
|                             | A_wavelet-LLL_glcmm_Idn                                | -2.188 |
|                             | A_wavelet-LLL_gldm_SmallDependenceLowGrayLevelEmphasis | -0.628 |
|                             | V_original_shape_LeastAxisLength                       | -4.439 |
|                             | V_original_shape_MajorAxisLength                       | 3.697  |
|                             | V_original_shape_Maximum2DDiameterRow                  | 3.138  |
|                             | V_original_shape_Maximum2DDiameterSlice                | -6.573 |
|                             | V_original_shape_MinorAxisLength                       | 1.433  |
|                             | V_original_shape_Sphericity                            | -3.090 |
|                             | V_original_shape_SurfaceArea                           | 2.766  |
|                             | V_original_shape_SurfaceVolumeRatio                    | -1.158 |
|                             | V_wavelet-HLH_glszm_ZoneEntropy                        | 0.126  |
|                             | V_wavelet-LHH_glcmm_Id                                 | -6.108 |
|                             | V_wavelet-LHH_glszm_ZoneEntropy                        | 0.904  |
|                             | A_original_shape_MajorAxisLength                       | 0.214  |
|                             | A_wavelet-HLH_glszm_ZoneEntropy                        | 0.101  |
|                             | A_original_shape_MinorAxisLength                       | -0.465 |
|                             | V_original_shape_Sphericity                            | -0.294 |
|                             | V_original_shape_Maximum2DDiameterRow                  | 0.238  |
|                             | V_wavelet-LHH_glszm_ZoneEntropy                        | 0.074  |
| Three-phase radiomics model | V_wavelet-LHH_glcmm_Id                                 | -0.867 |
|                             | NC_original_shape_MajorAxisLength                      | 0.758  |
|                             | NC_original_shape_Maximum2DDiameterRow                 | 0.049  |
|                             | NC_original_shape_SurfaceVolumeRatio                   | -0.154 |
|                             | NC_original_shape_MinorAxisLength                      | 0.055  |
|                             | NC_original_shape_LeastAxisLength                      | -0.509 |
|                             | NC_wavelet-HLL_glszm_ZoneEntropy                       | 0.464  |
| Combined model              | NC_wavelet-HLH_glszm_ZoneEntropy                       | -0.302 |
|                             | PCA_feature_1                                          | 0.406  |
|                             | PCA_feature_2                                          | 0.498  |
|                             | PCA_feature_3                                          | -0.773 |
|                             | PCA_feature_4                                          | 0.400  |
|                             | PCA_feature_5                                          | -0.814 |
|                             | PCA_feature_6                                          | 0.246  |
|                             | PCA_feature_8                                          | -0.534 |
|                             | PCA_feature_9                                          | -0.481 |
|                             | PCA_feature_11                                         | 0.608  |
|                             | PCA_feature_16                                         | -0.414 |

---
